# Supplementary material for: Stable Cu2O nanocrystals grown on functionalized graphene sheets and room temperature H2S gas sensing with ultrahigh sensitivity
Source: Royal Society of Chemistry journal article supplement (doi:10.1039/c2nr33164k), 2012-12-14
Supplement: c2nr33164k.pdf [file c2nr33164k.pdf]

## Supporting Information

# Stable Cu<sub>2</sub>O nanocrystals grown on functionalized graphene sheets and room temperature H<sub>2</sub>S gas sensing with ultrahigh sensitivity

Lisha Zhou<sup>a,b</sup>, Fangping Shen<sup>a</sup>, Xike Tian<sup>b</sup>, Donghong Wang<sup>a</sup>, Ting Zhang<sup>a\*</sup>, Wei Chen<sup>a\*</sup>

<sup>a</sup> i-Lab, Suzhou Institute of Nano-Tech and Nano-Bionics

Chinese Academy of Sciences, Suzhou, 215123, China.

E-mail: [wchen2006@sinano.ac.cn](mailto:wchen2006@sinano.ac.cn); [tzhang2009@sinano.ac.cn](mailto:tzhang2009@sinano.ac.cn)

<sup>b</sup> Faculty of Material Science and Chemical Engineering, China University of Geosciences, Wuhan 430074, PR China

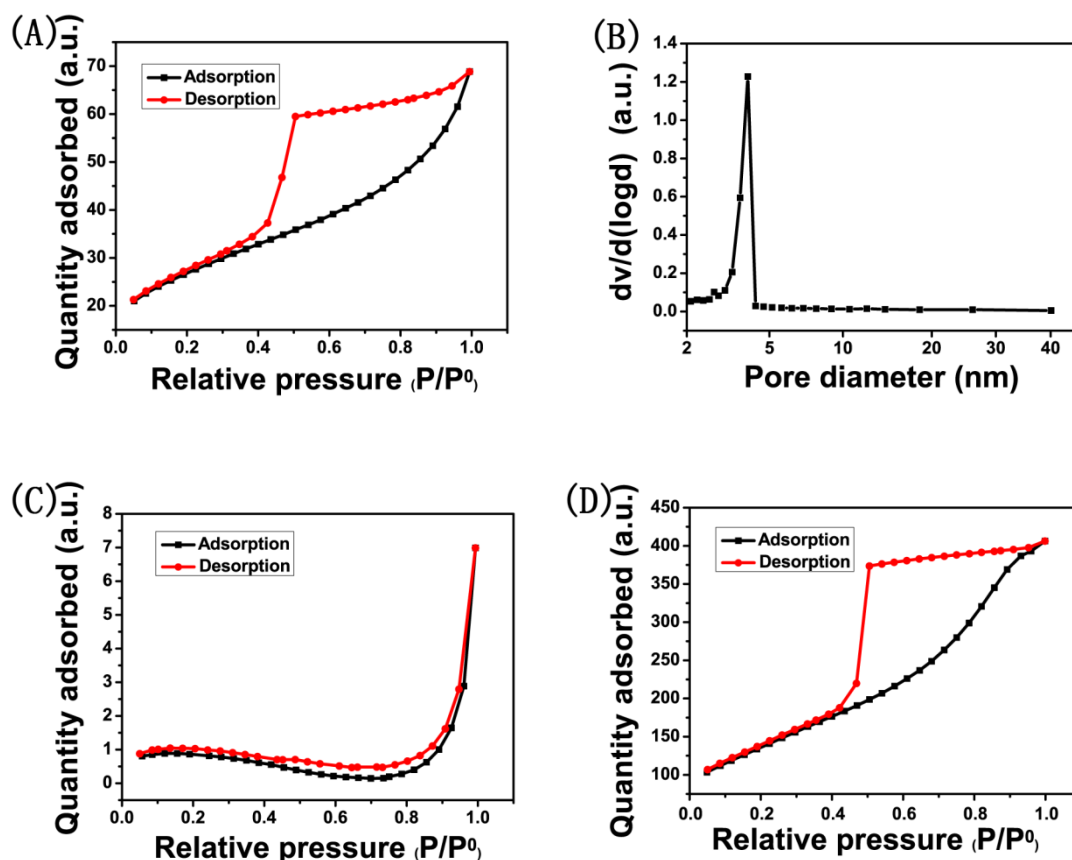

**Fig.S1** (A) N<sub>2</sub> adsorption-desorption isotherms and (B) corresponding BJH pore size distribution curve determined from the N<sub>2</sub> desorption isotherm of as-prepared

Cu<sub>2</sub>O/FGS nanocomposite. (C) N<sub>2</sub> adsorption-desorption isotherms of bulk Cu<sub>2</sub>O with BET surface of 2.18 m<sup>2</sup>/g and pore volume of 0.01 cm<sup>3</sup>/g, (D) N<sub>2</sub> adsorption-desorption isotherms of pure FGS with BET surface of 477.33 m<sup>2</sup>/g and pore volume of 0.63 cm<sup>3</sup>/g.

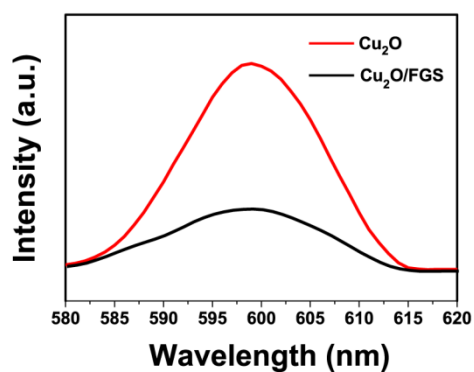

**Fig.S2** Photoluminescence spectra of pure Cu<sub>2</sub>O and Cu<sub>2</sub>O /FGS nanocomposite.
